# Supplementary material for: Mixture model normalization for non-targeted gas chromatography/mass spectrometry metabolomics data
Source: PubMed Central journal article supplement (PMC5290663; doi:10.1186/s12859-017-1501-7), 2017-02-02

**Figure S10**

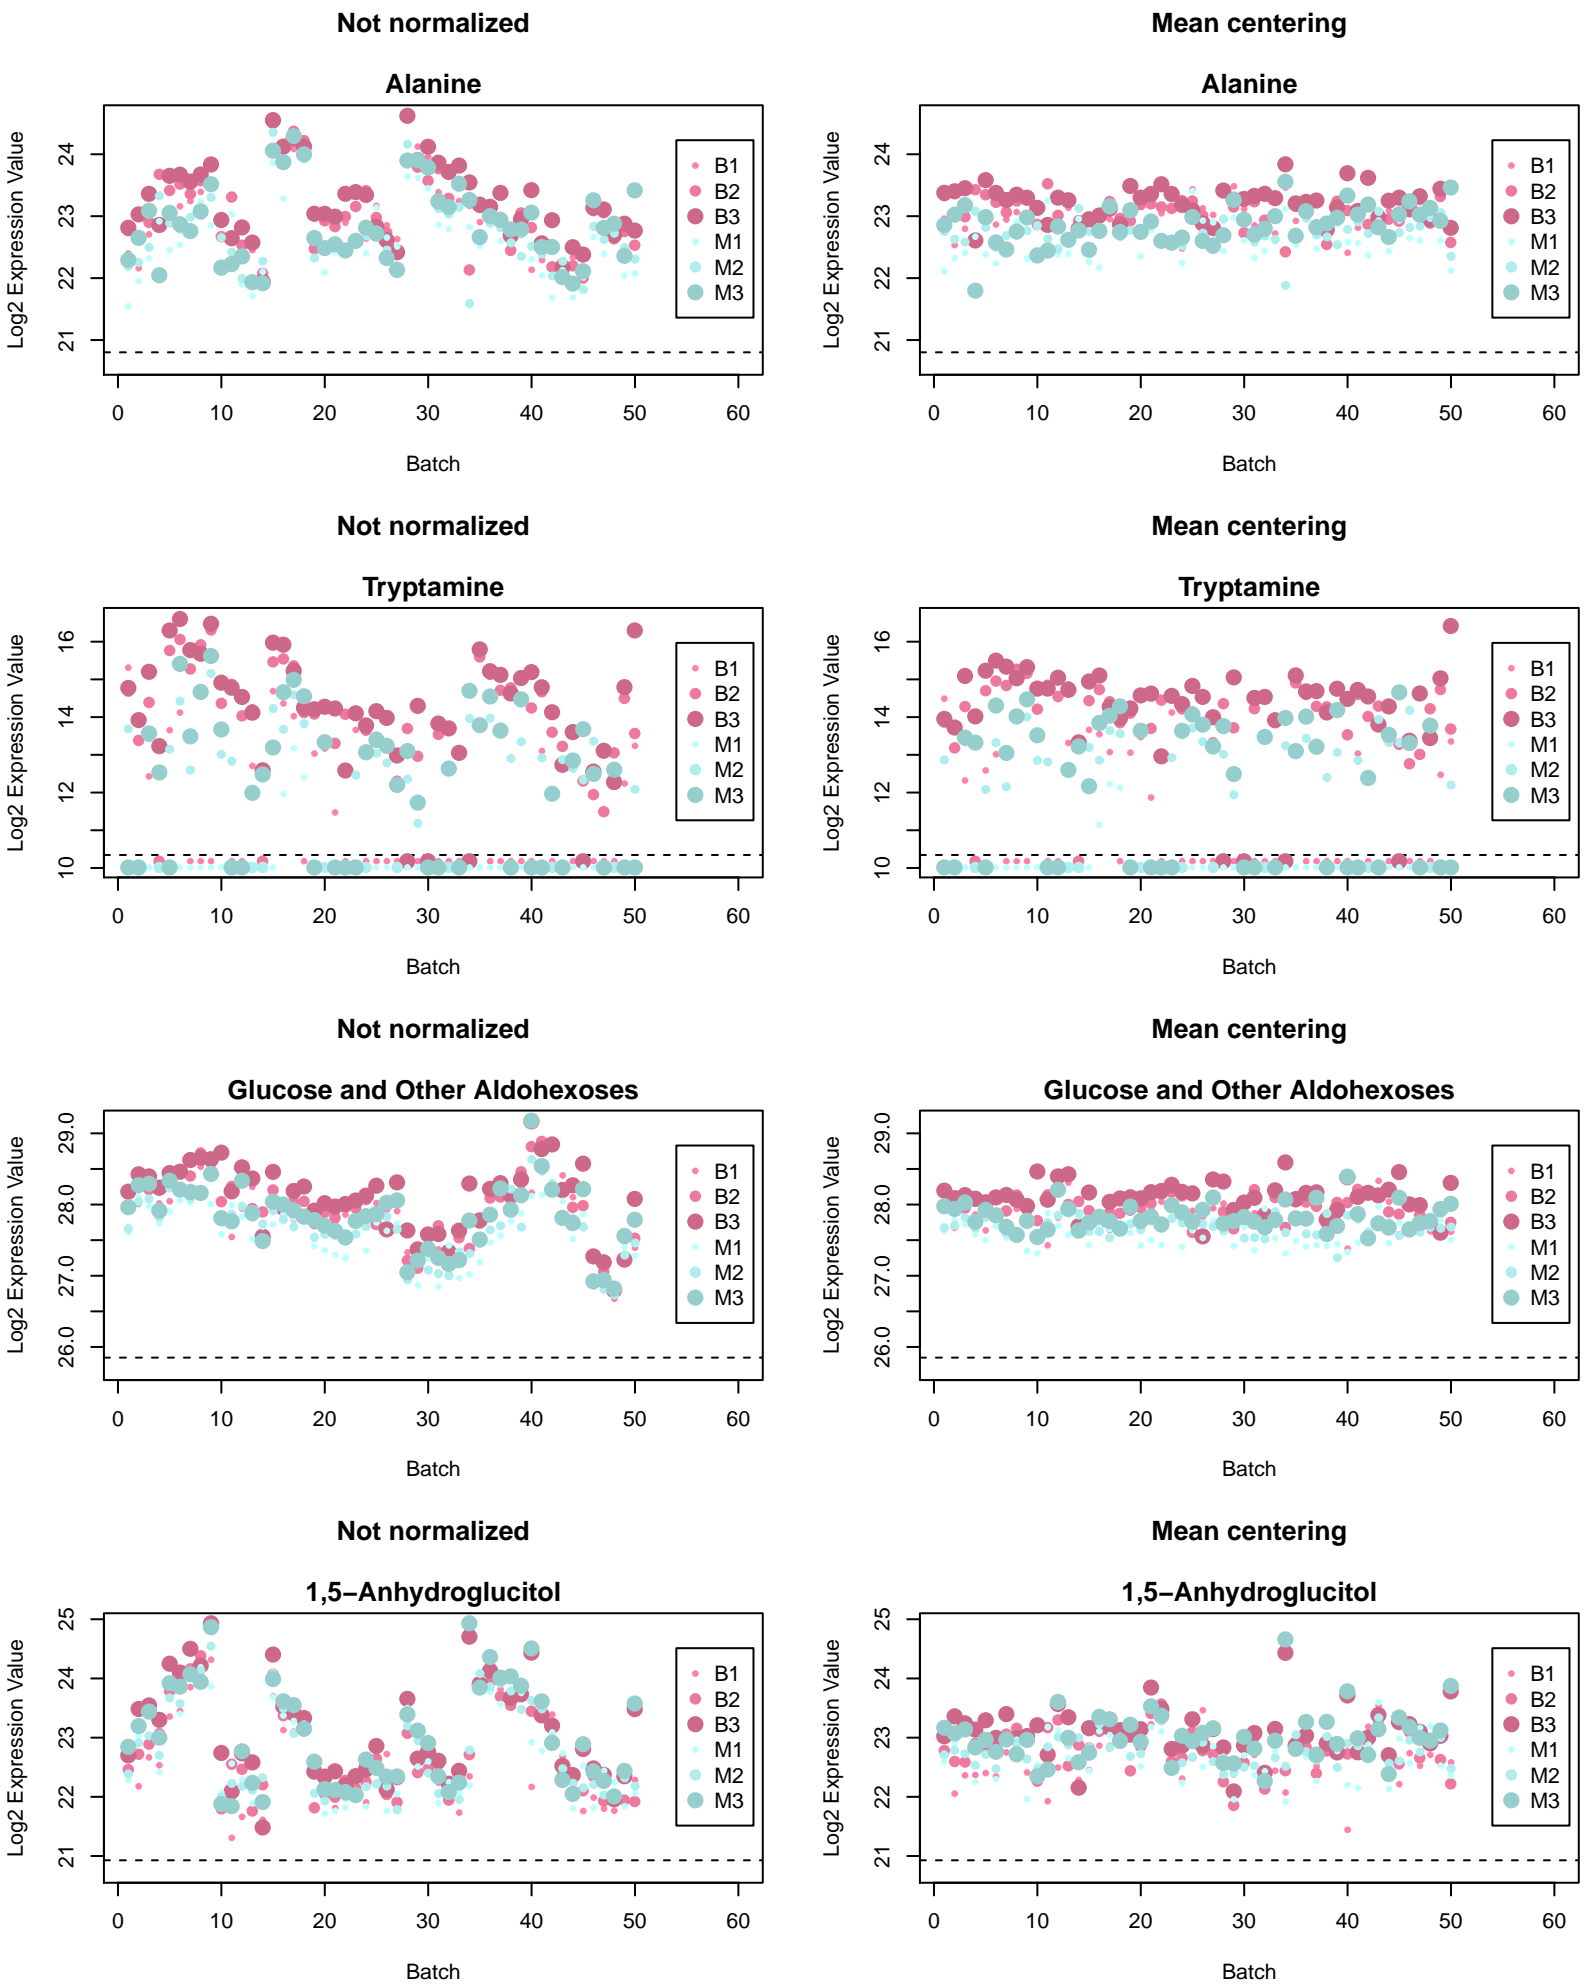

**Figure S11**

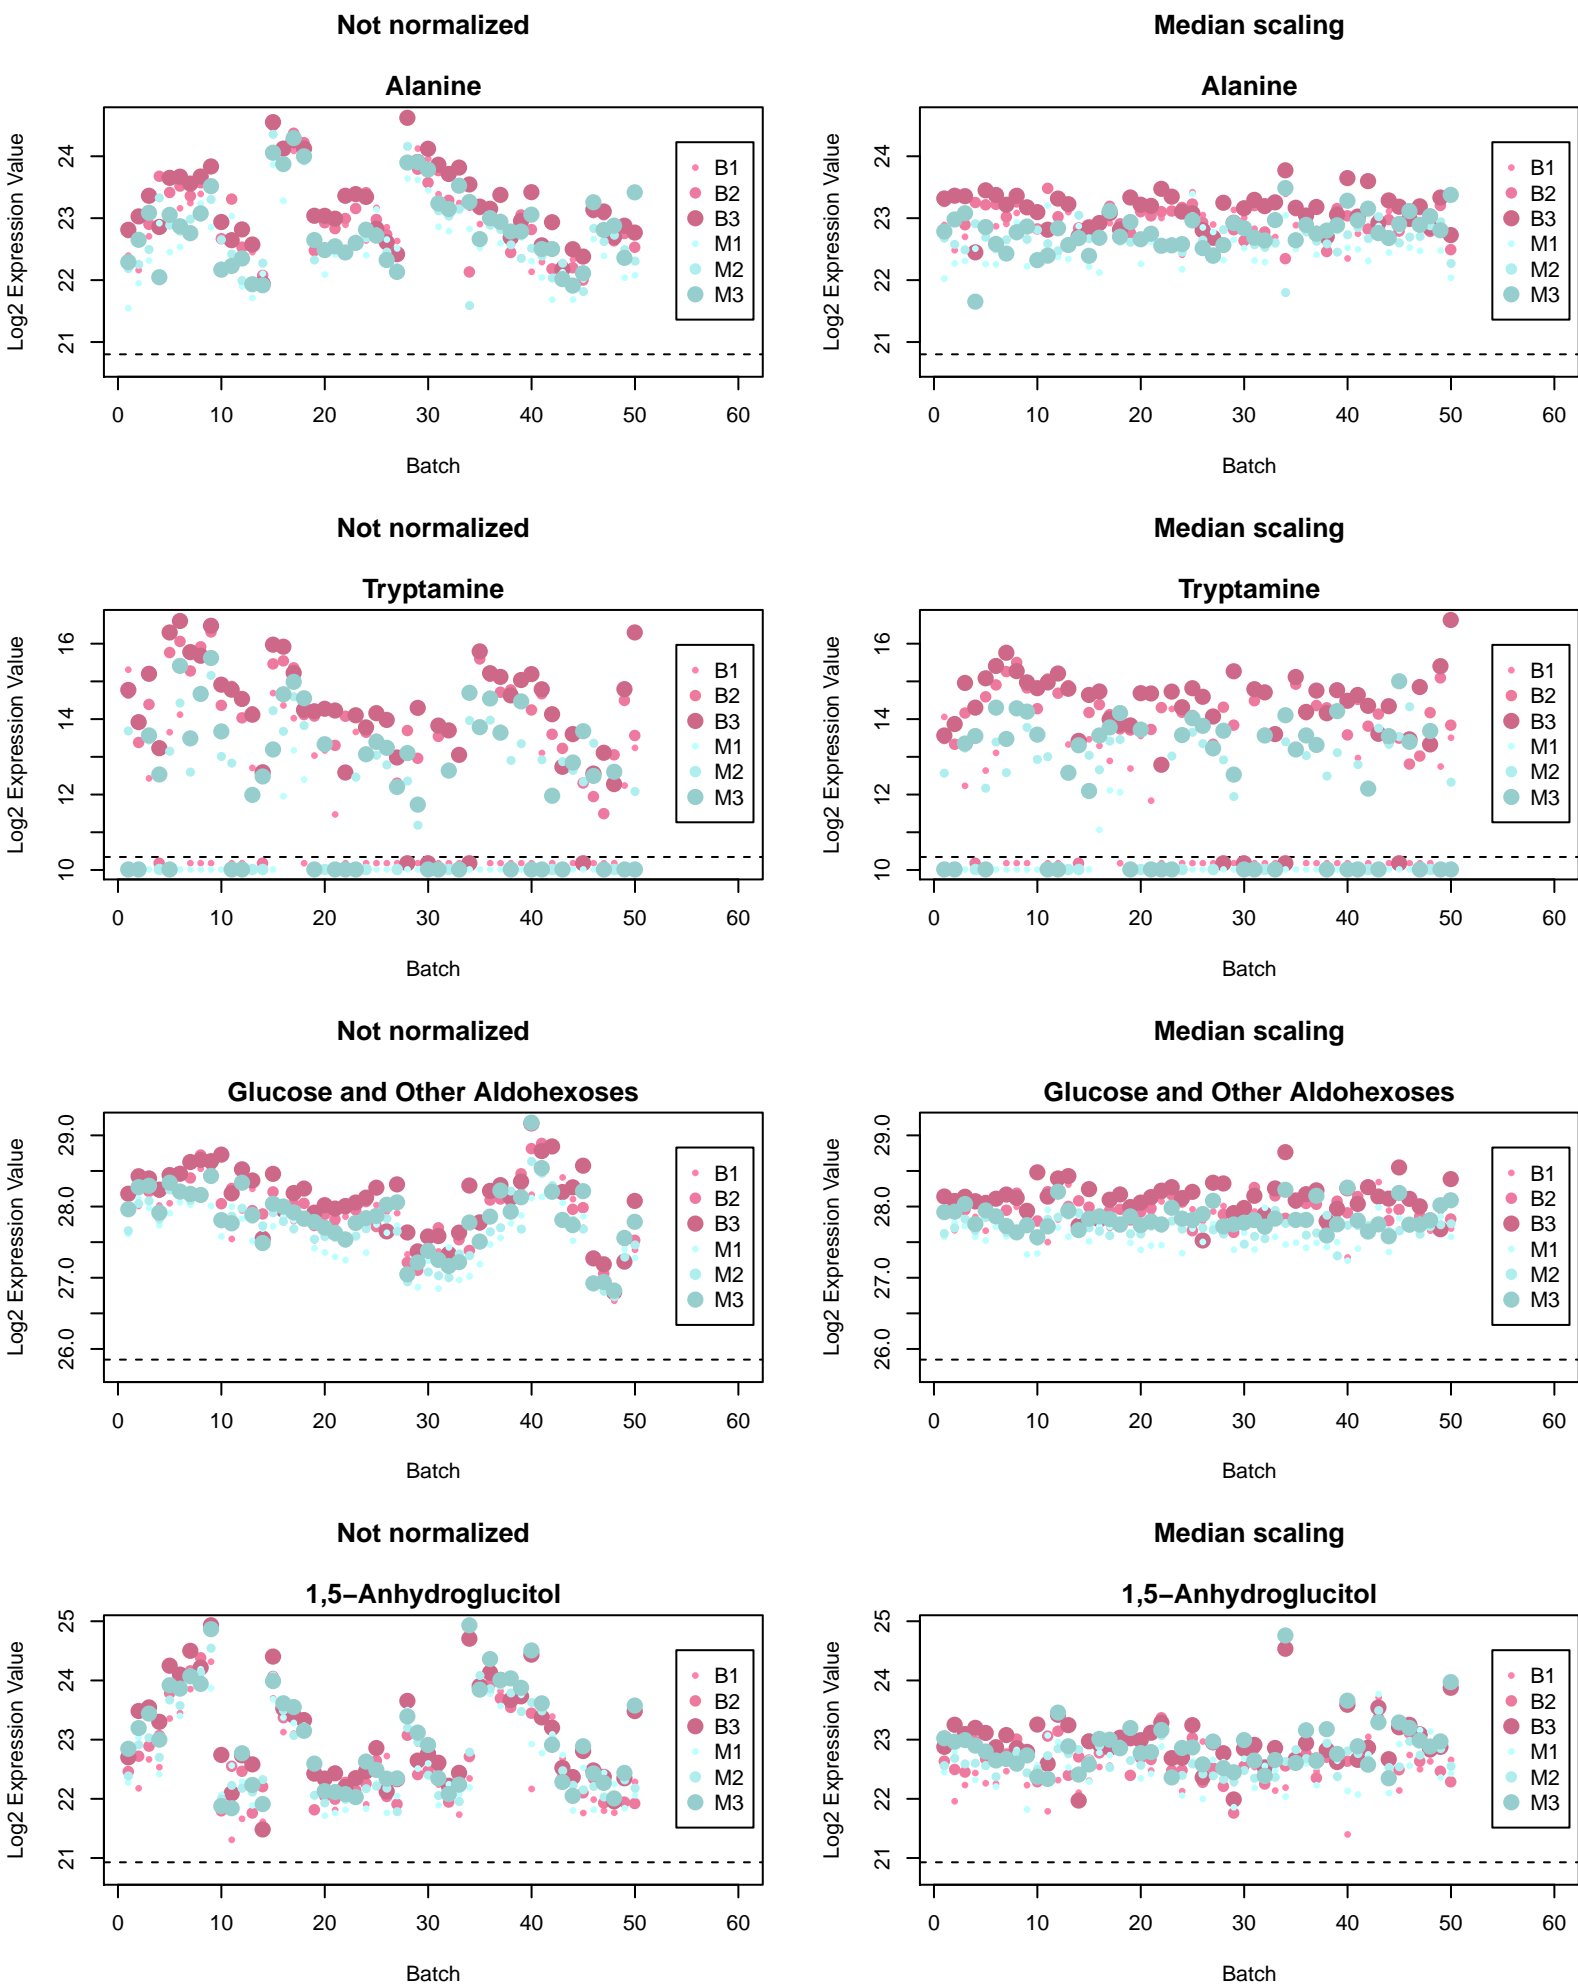

Figure S12

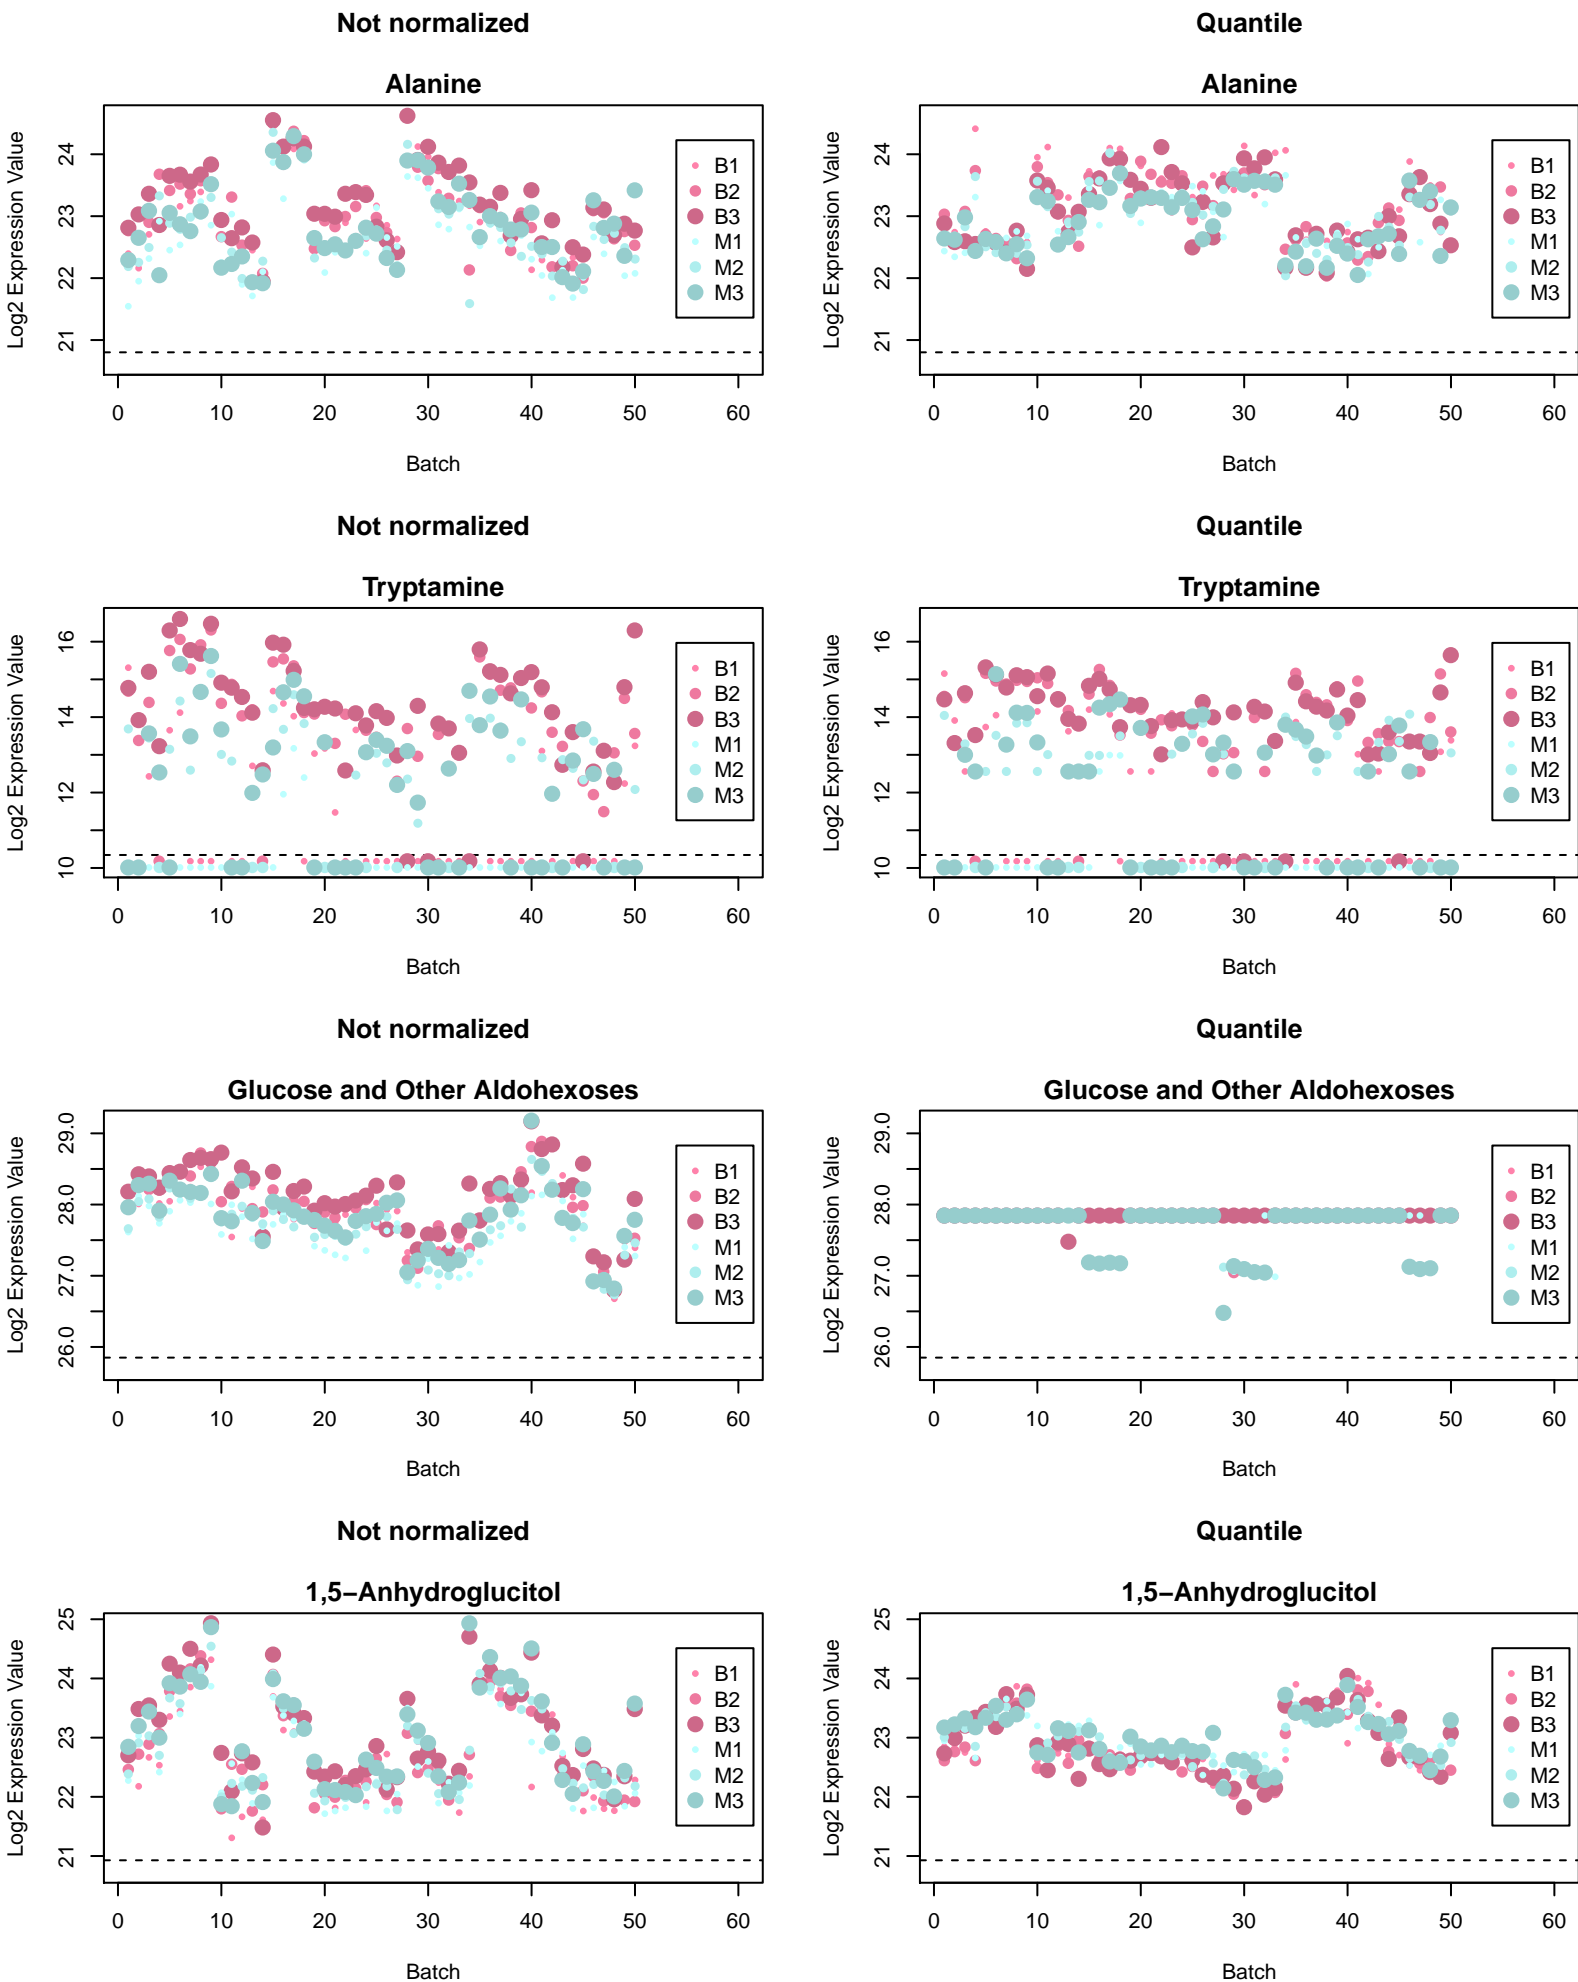

**Figure S13**

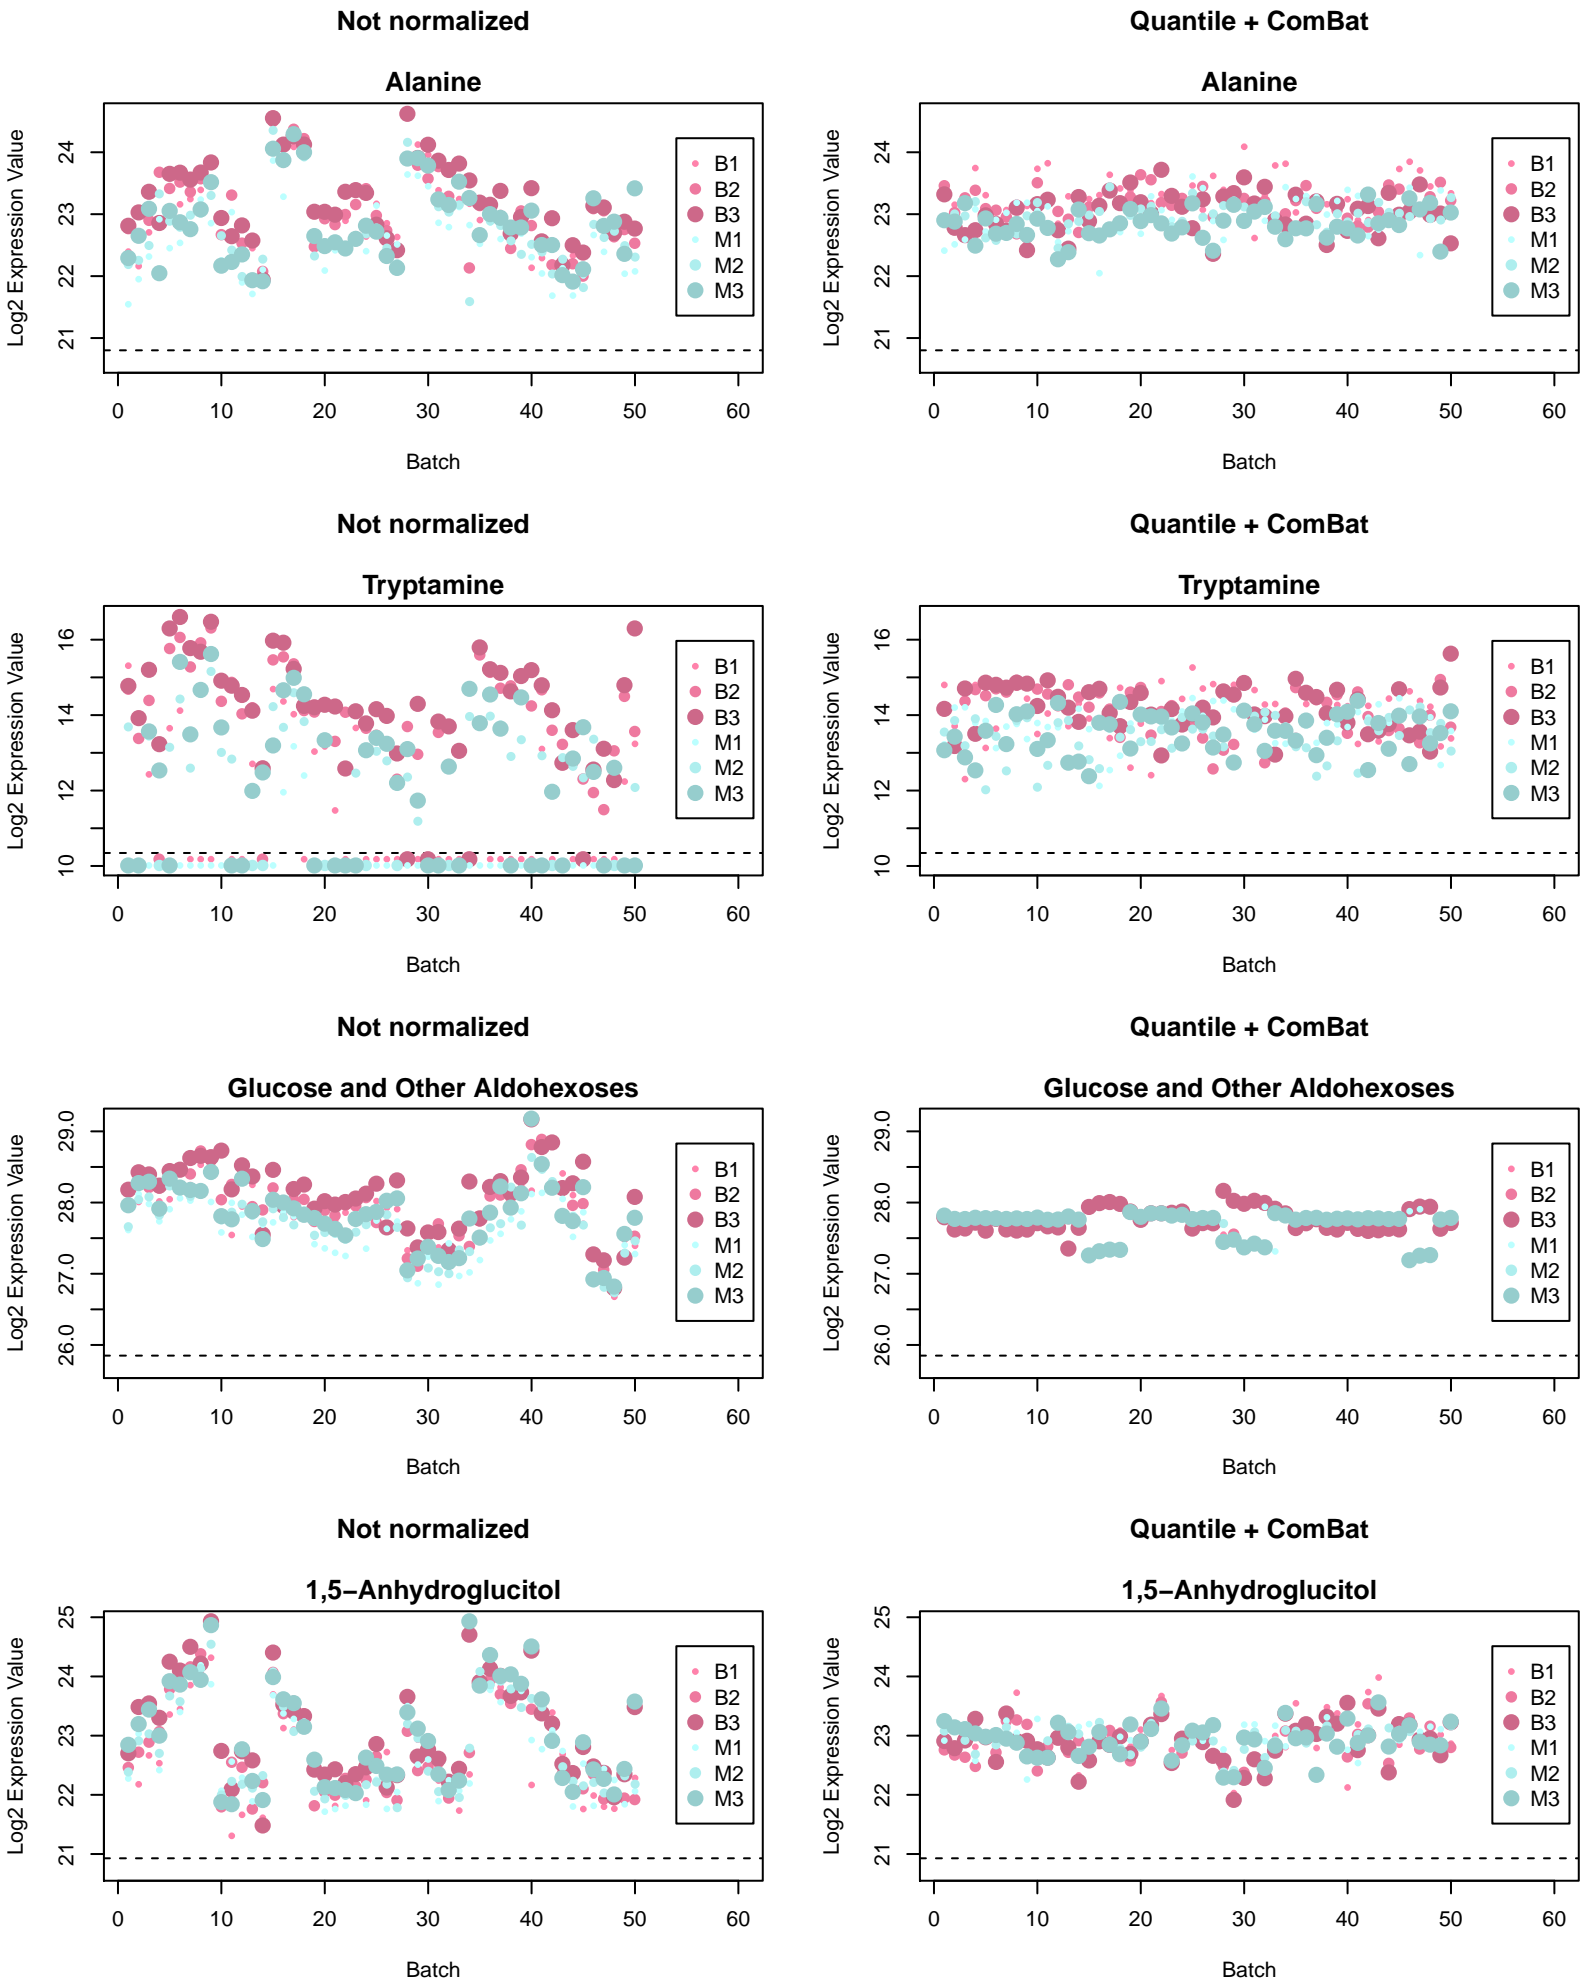

**Figure S14**

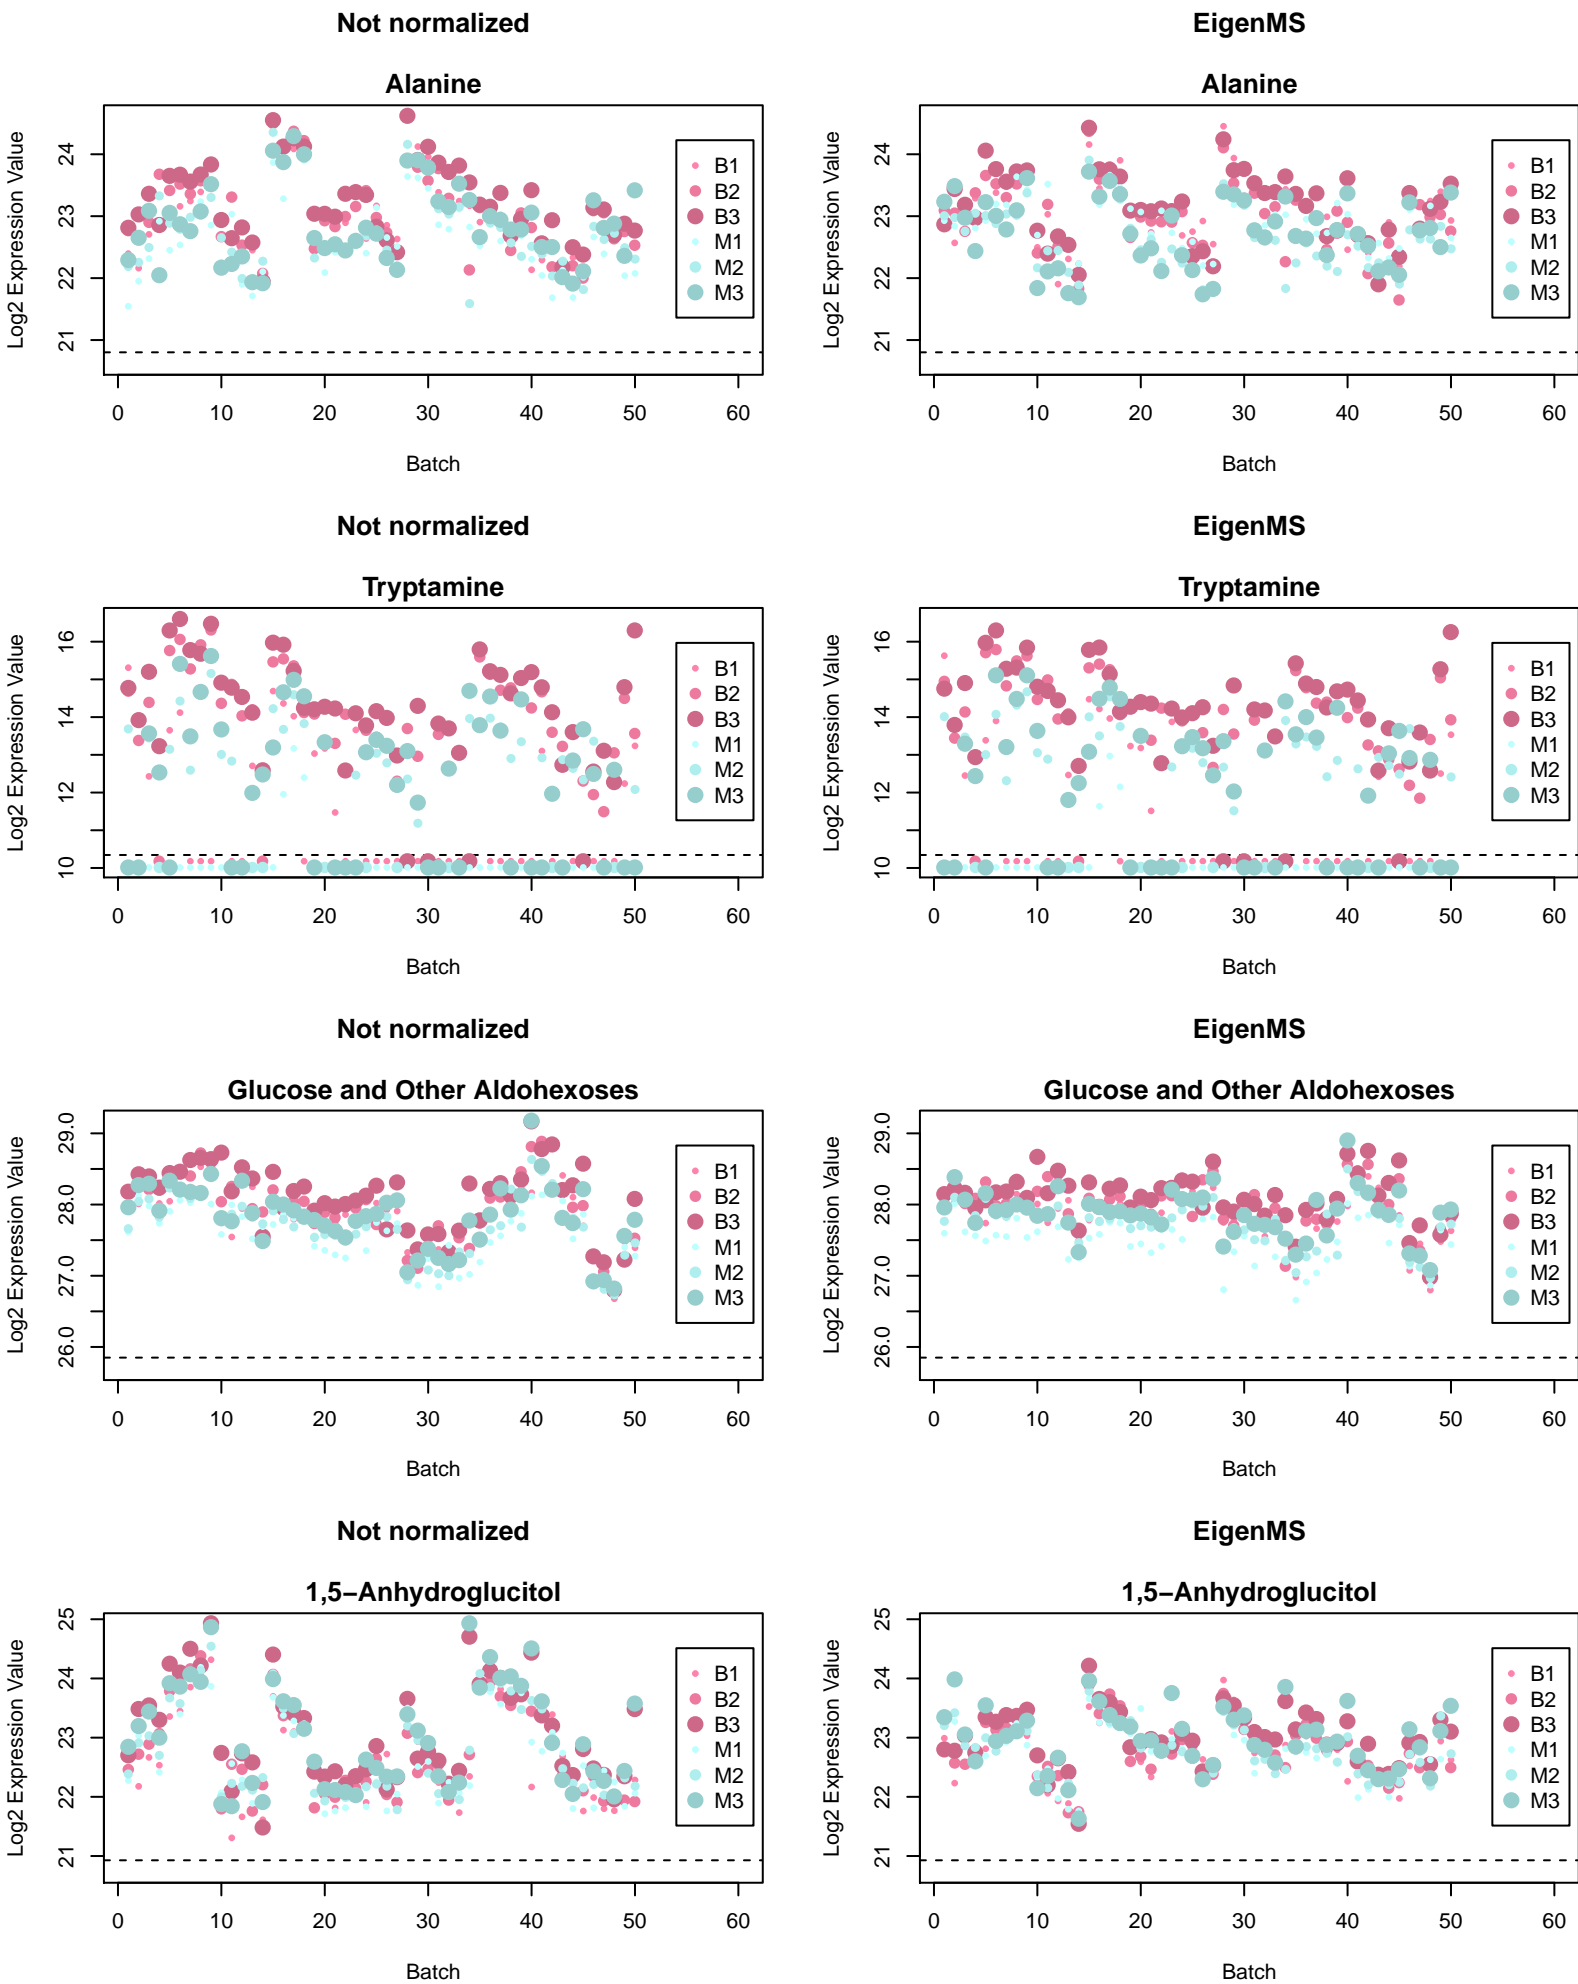

**Figure S15**

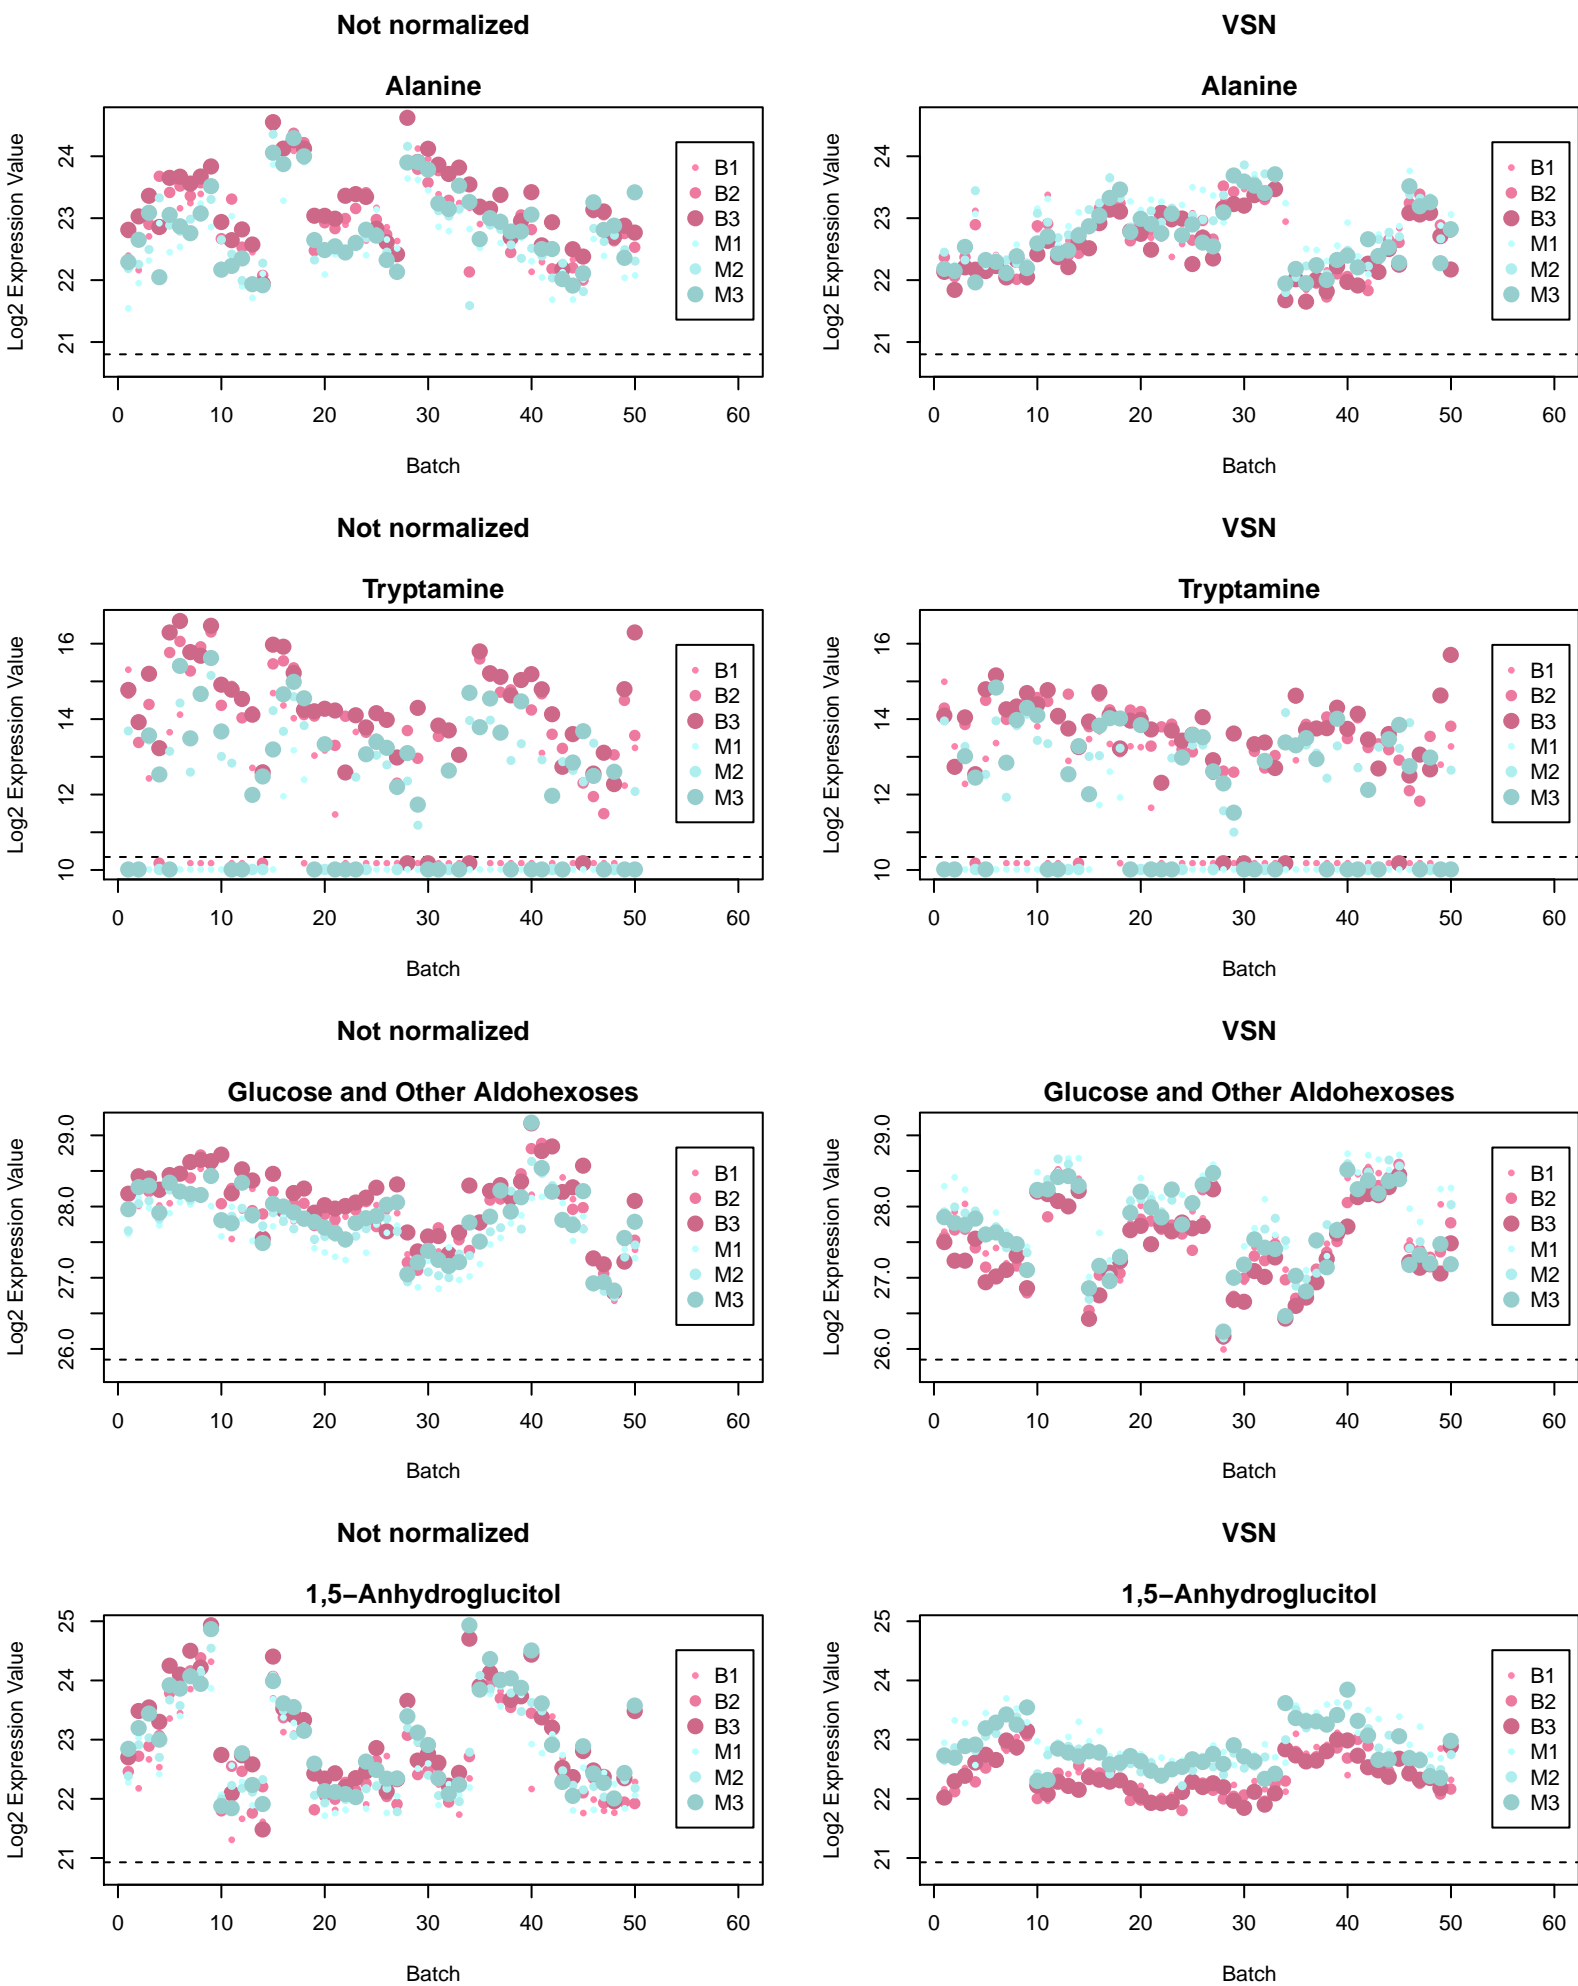

**Figure S16**

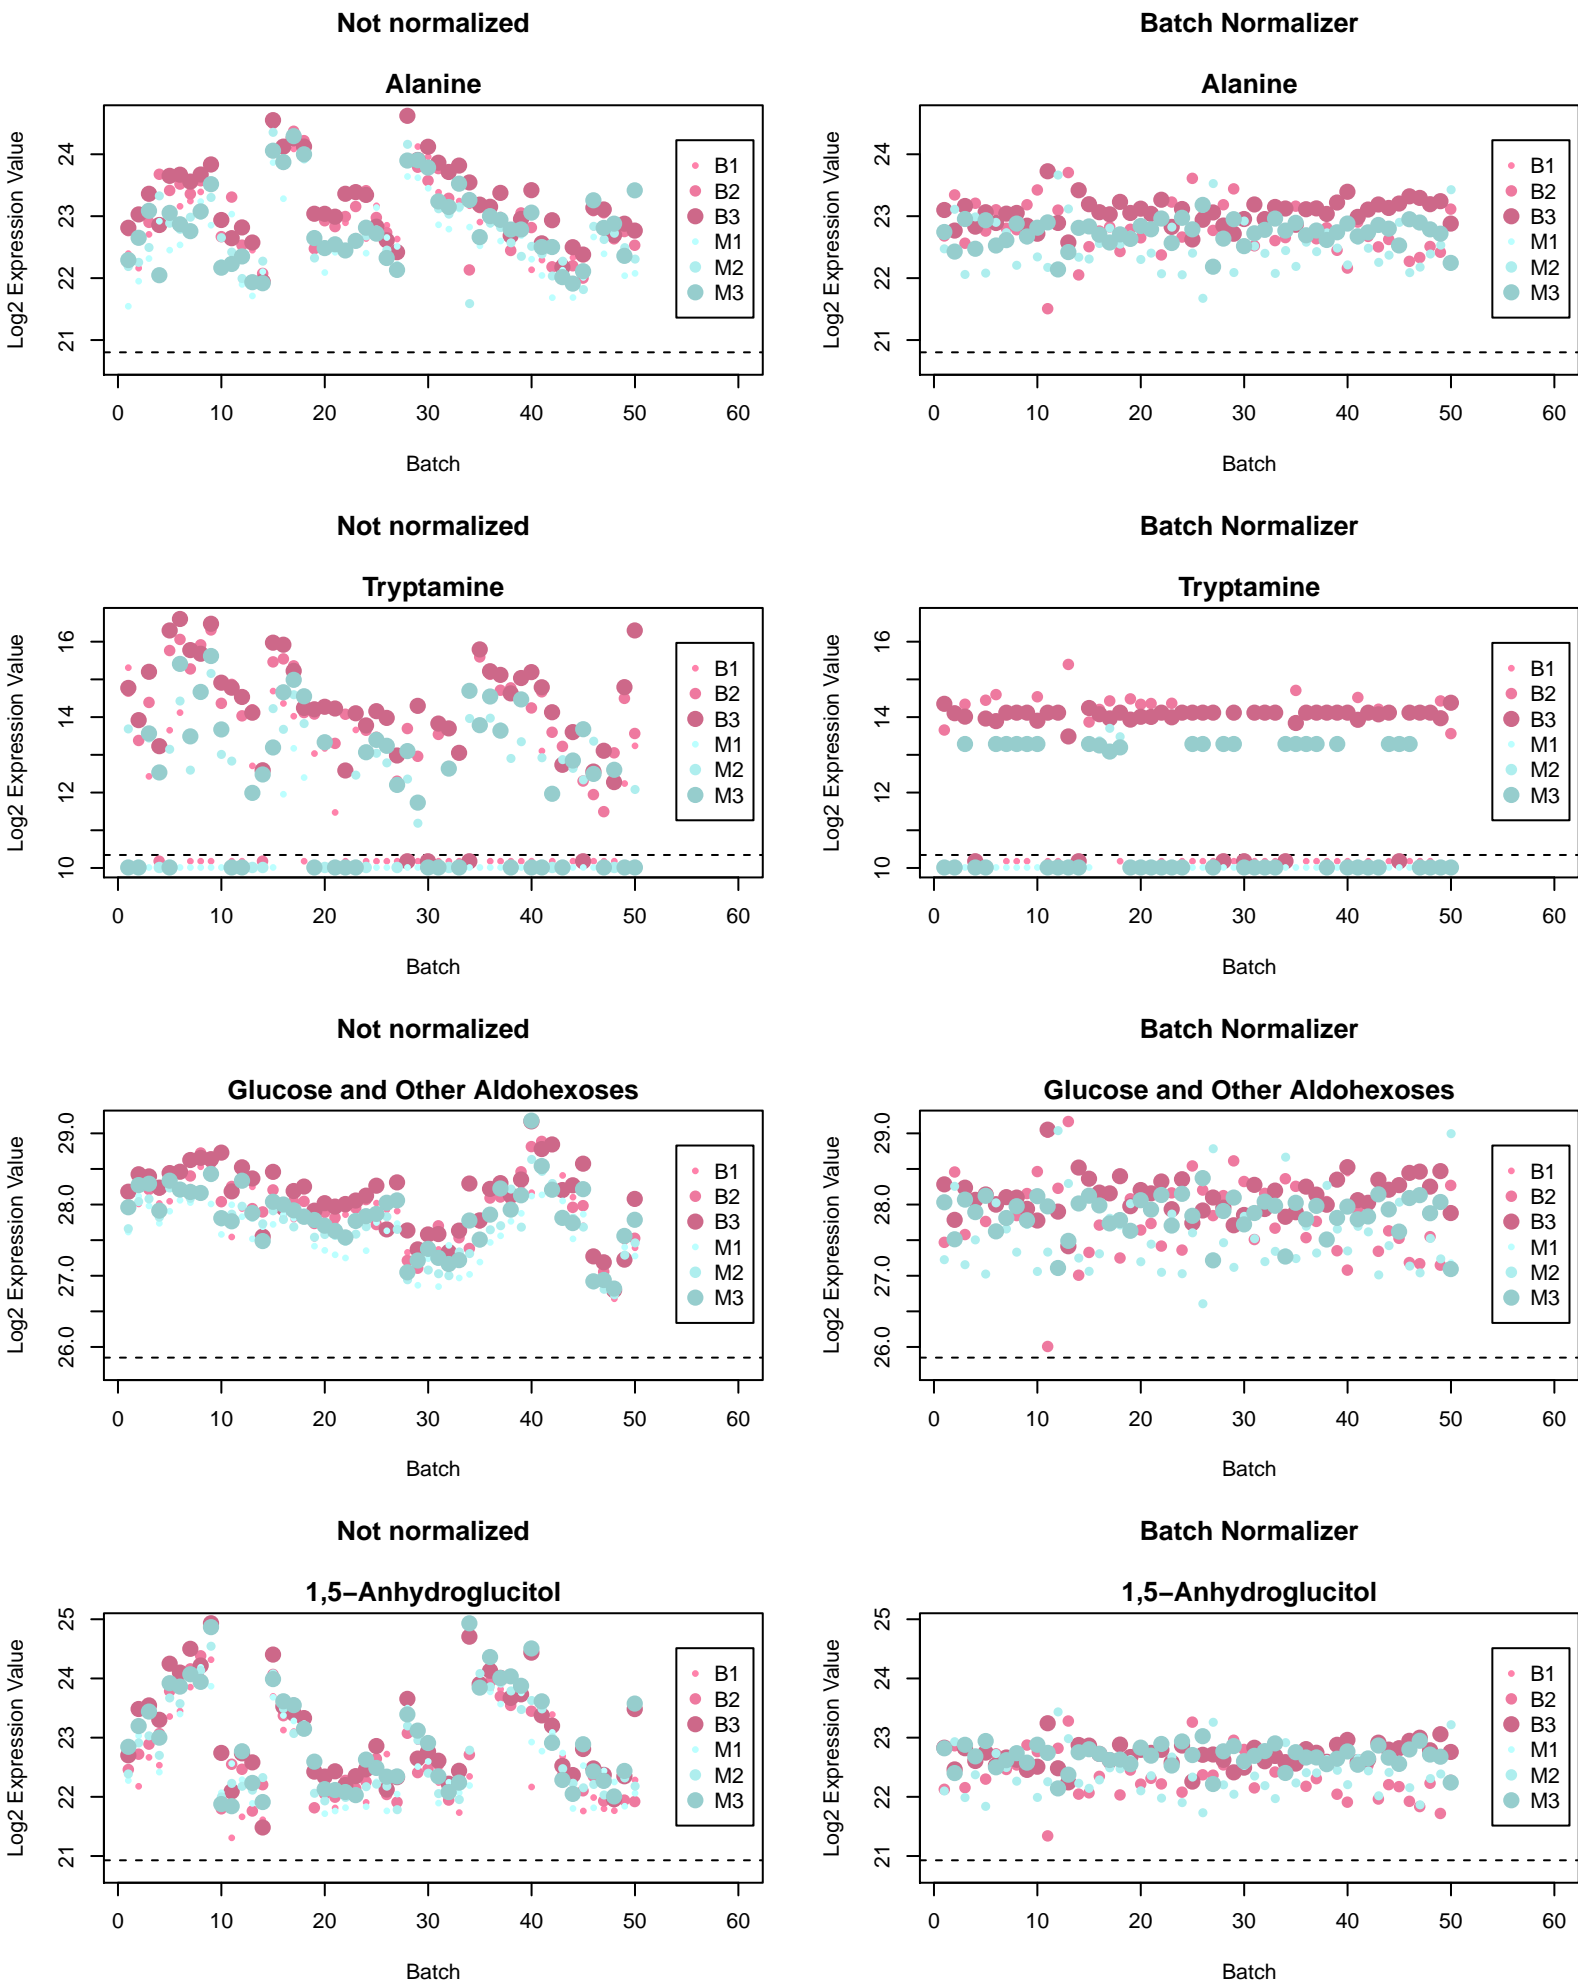

Supplement: 12859_2017_1501_MOESM6_ESM.pdf [file 12859_2017_1501_MOESM6_ESM.pdf]
